# Supplementary material for: ­­­­­­Widespread conservation and lineage-specific diversification of genome-wide DNA methylation patterns across arthropods
Source: PubMed Central journal article supplement (PMC7343188; doi:10.1371/journal.pgen.1008864), 2020-06-25

# *Limulus polyphemus*

## TEs with domains, singly-annotated CpGs

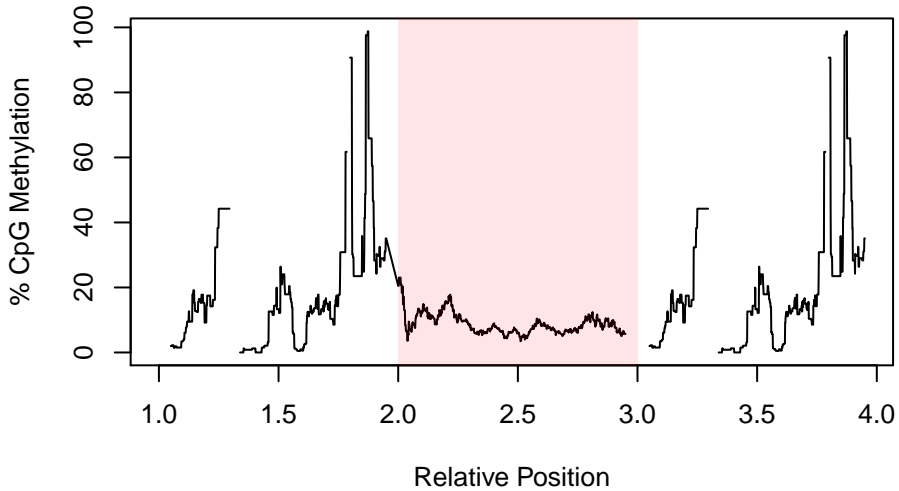

## TEs with domains, all CpGs

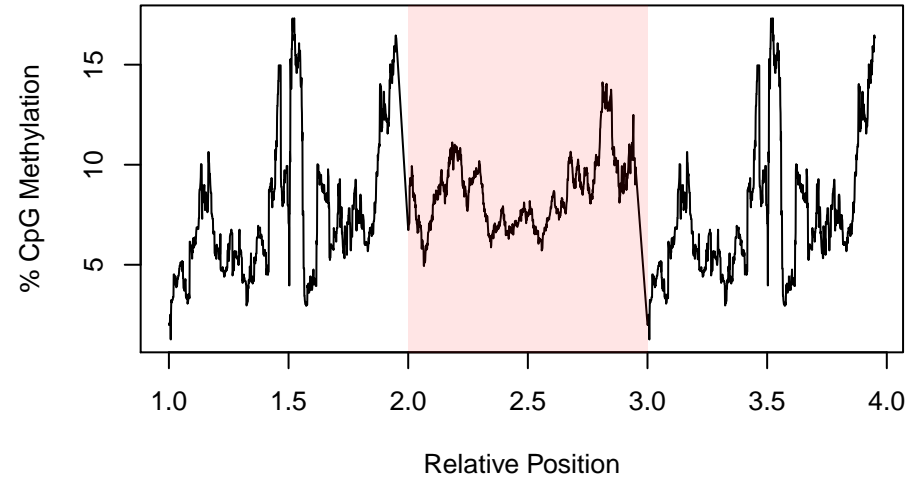

## All TEs, singly-annotated CpGs

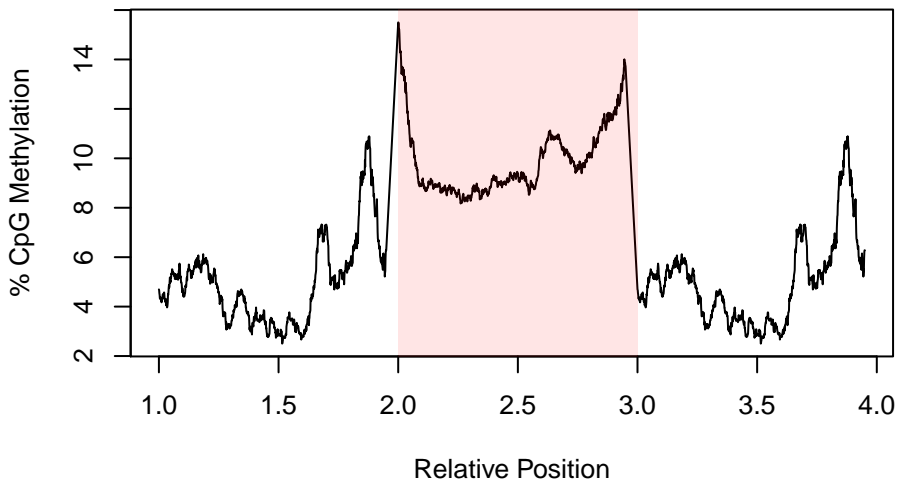

## All TEs, all CpGs

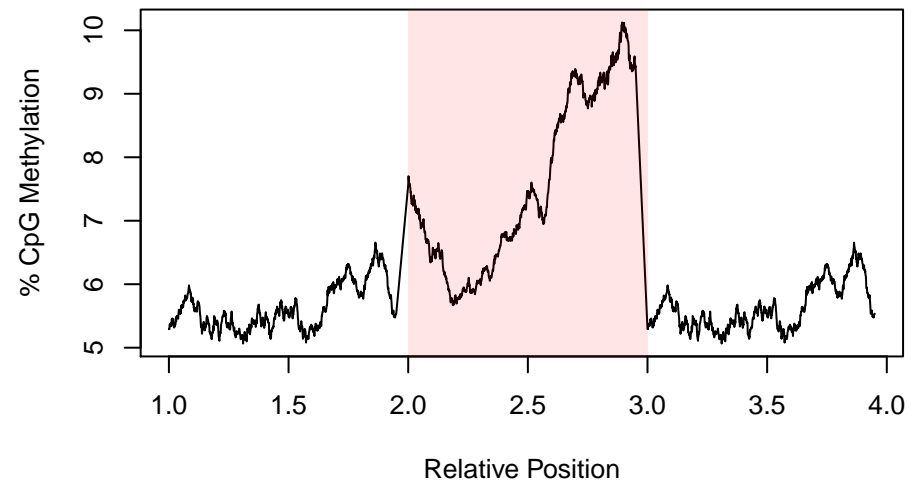

# *Parasteatoda tepidariorum*

## TEs with domains, singly-annotated CpGs

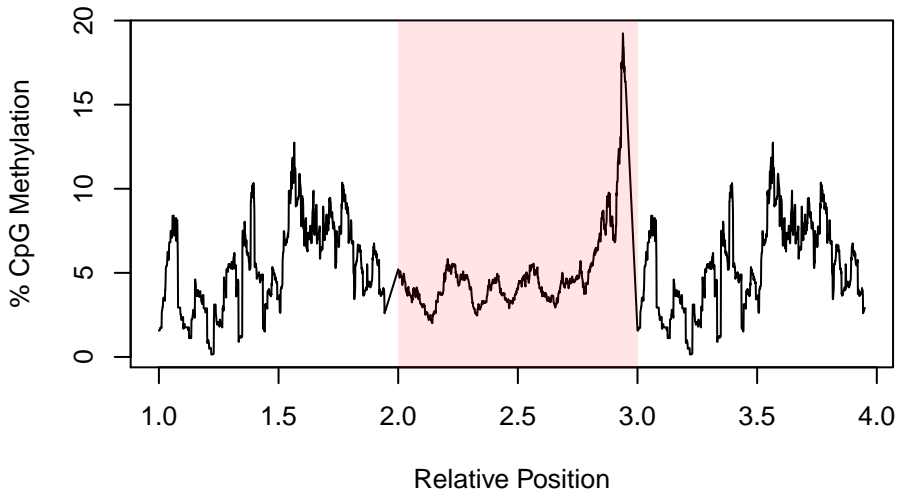

## TEs with domains, all CpGs

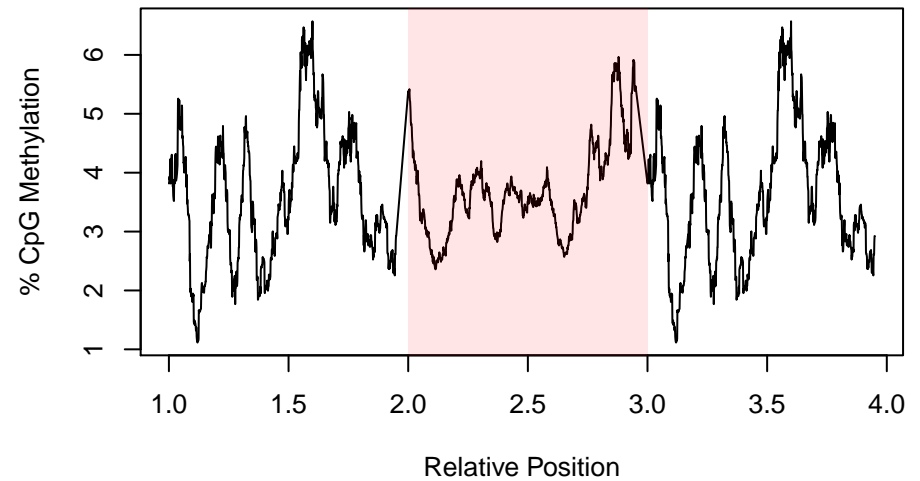

## All TEs, singly-annotated CpGs

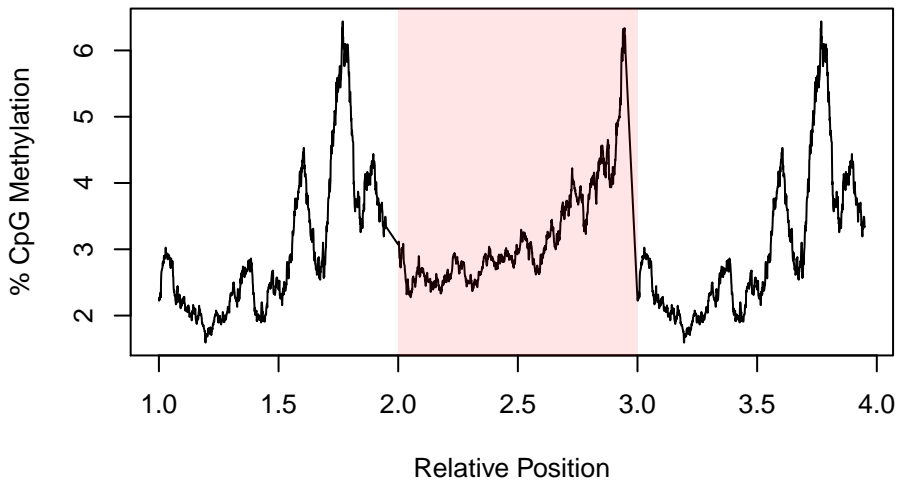

## All TEs, all CpGs

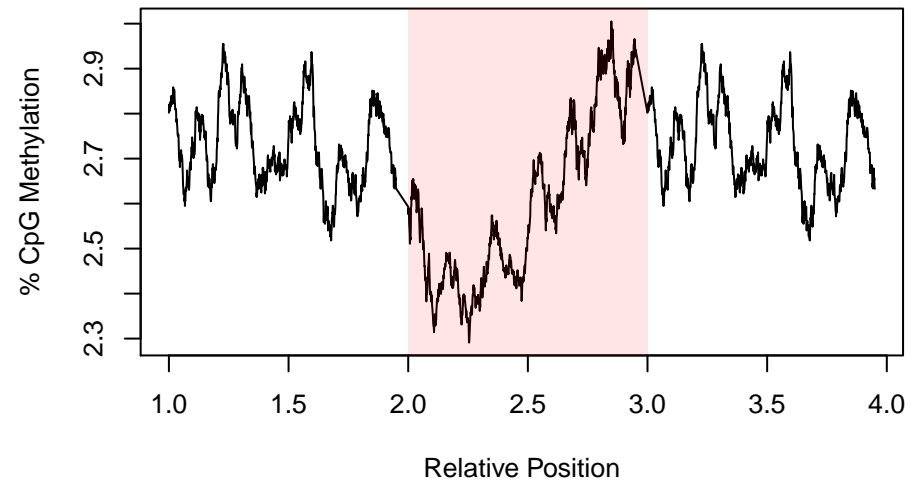

# *Ixodes scapularis*

## TEs with domains, singly-annotated CpGs

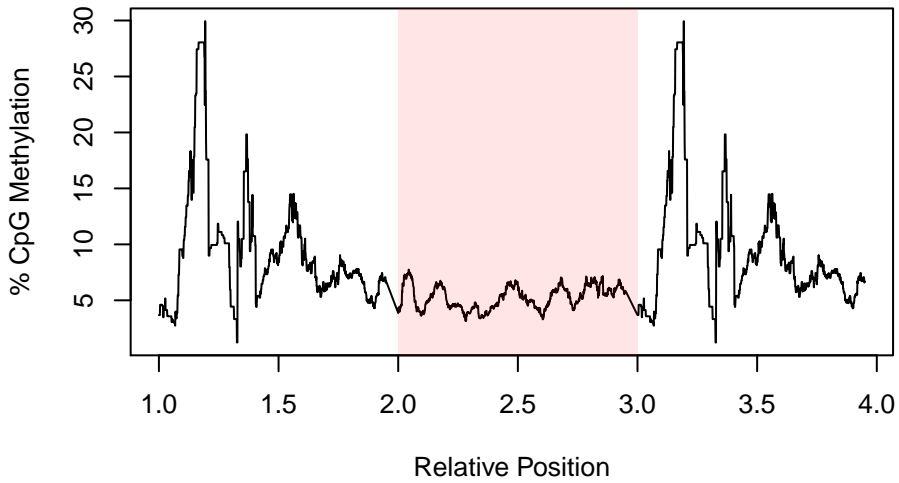

## TEs with domains, all CpGs

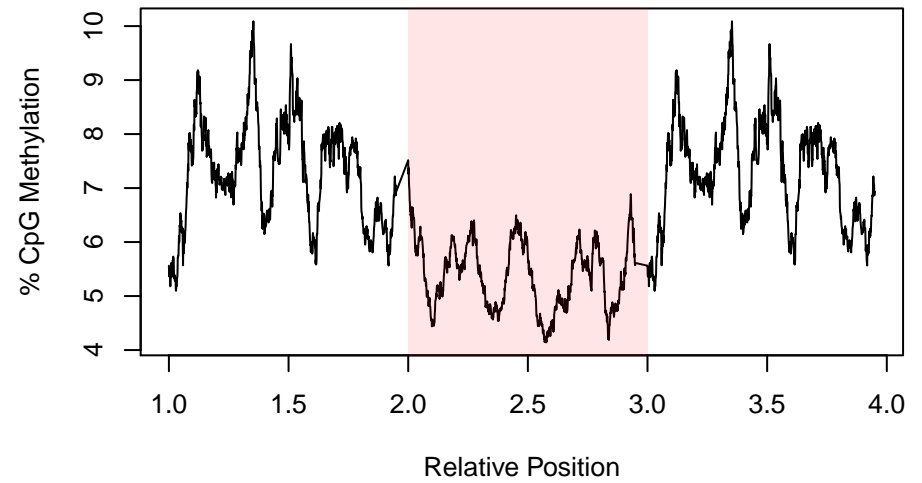

## All TEs, singly-annotated CpGs

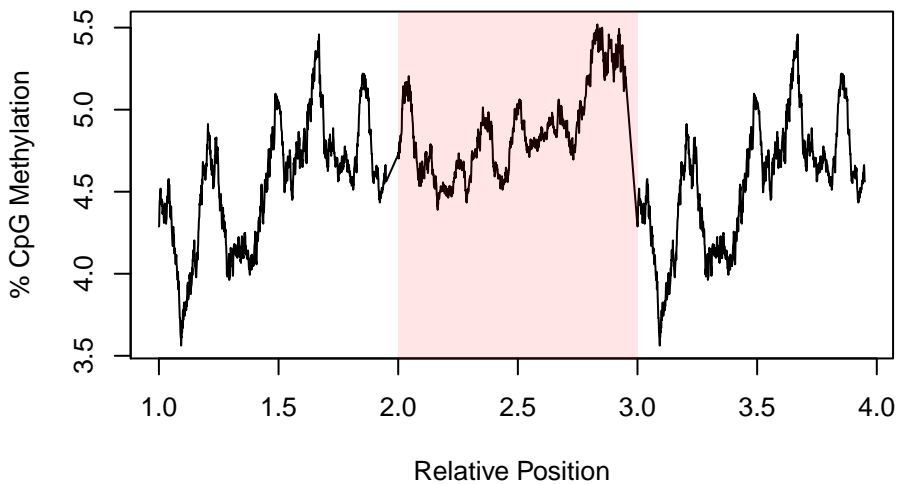

## All TEs, all CpGs

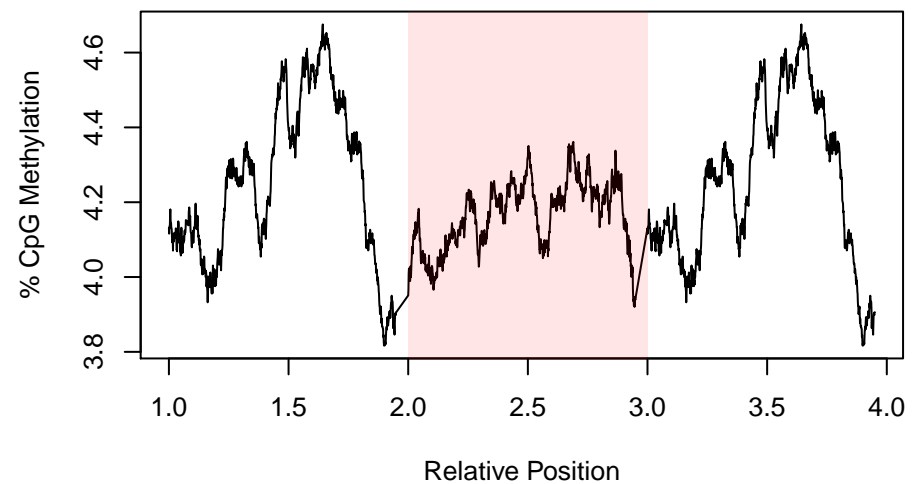

# *Strigamia maritima*

## TEs with domains, singly-annotated CpGs

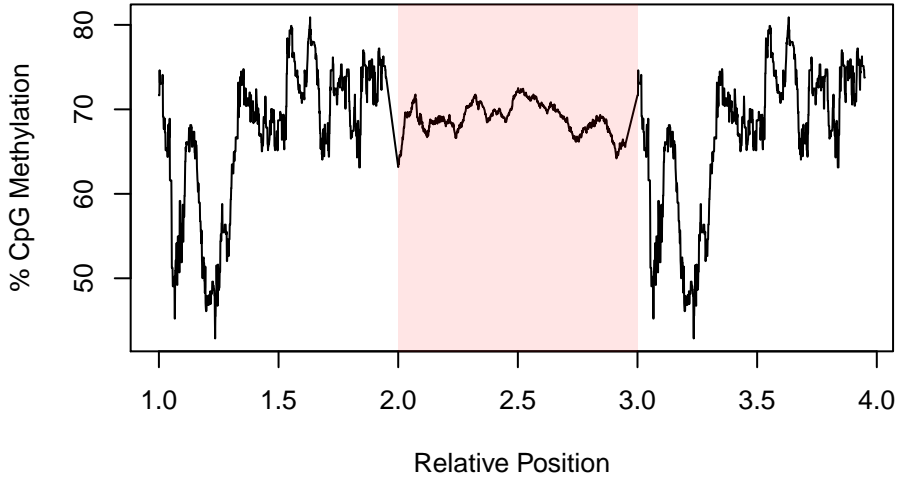

## TEs with domains, all CpGs

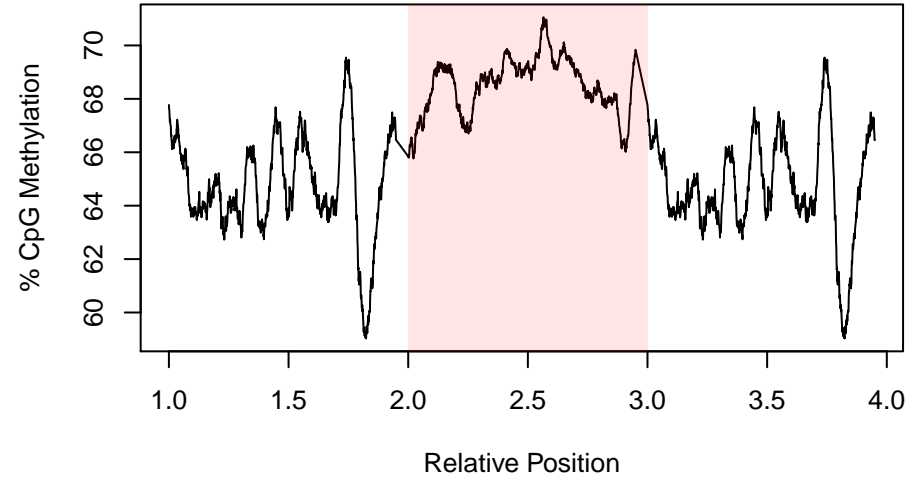

## All TEs, singly-annotated CpGs

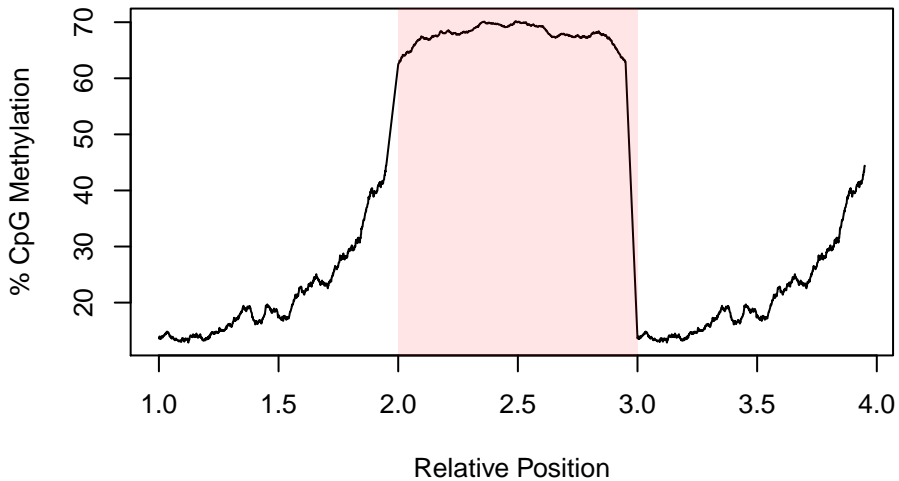

## All TEs, all CpGs

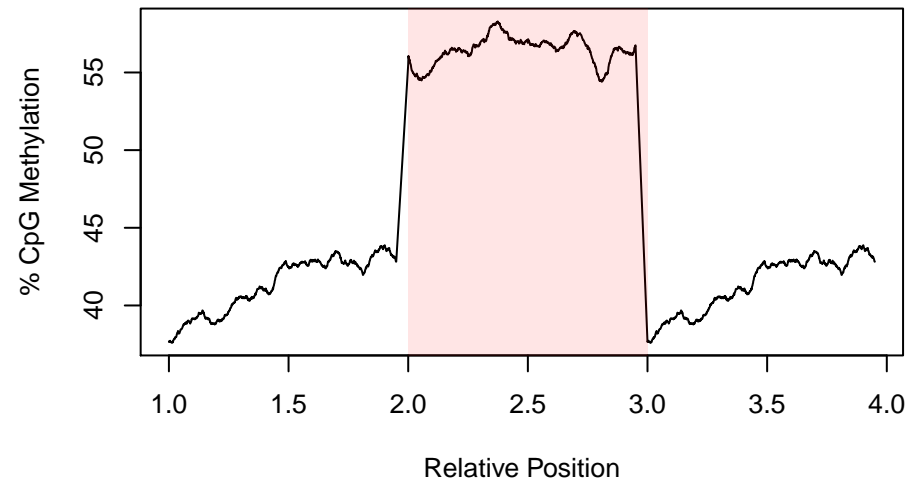

# Blattella germanica

## TEs with domains, singly-annotated CpGs

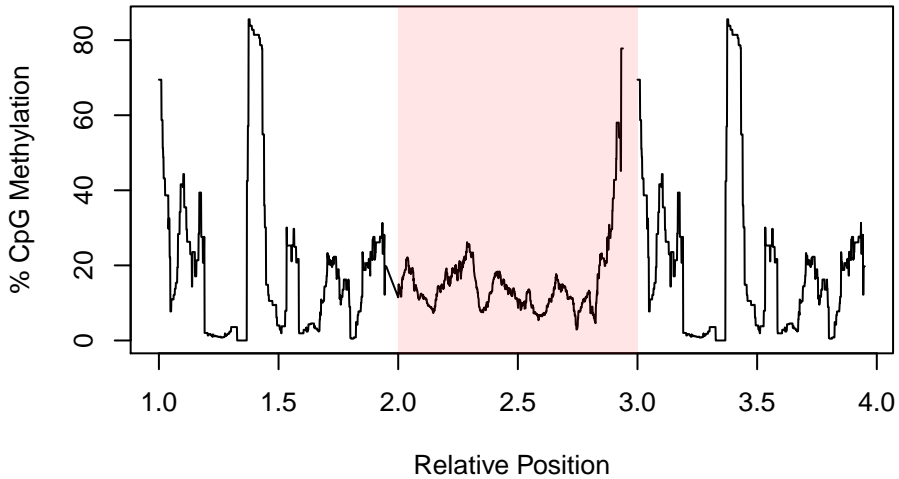

## TEs with domains, all CpGs

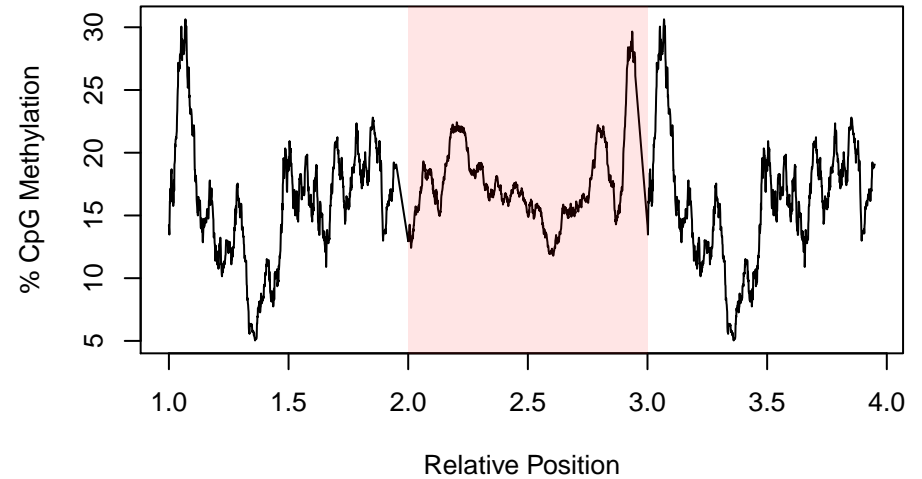

## All TEs, singly-annotated CpGs

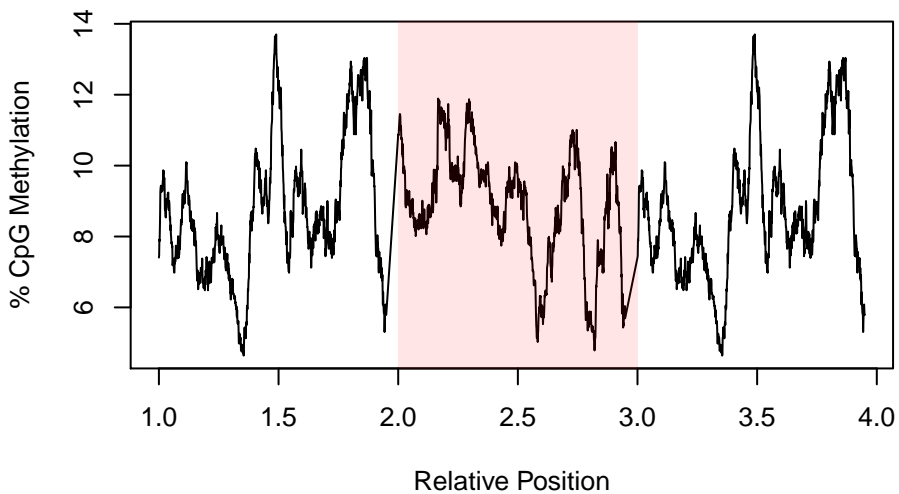

## All TEs, all CpGs

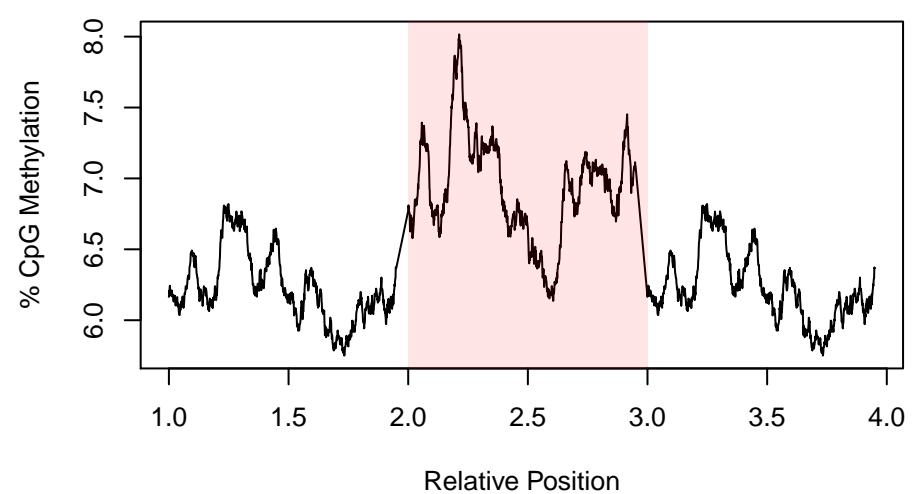

# Planococcus citri

## TEs with domains, singly-annotated CpGs

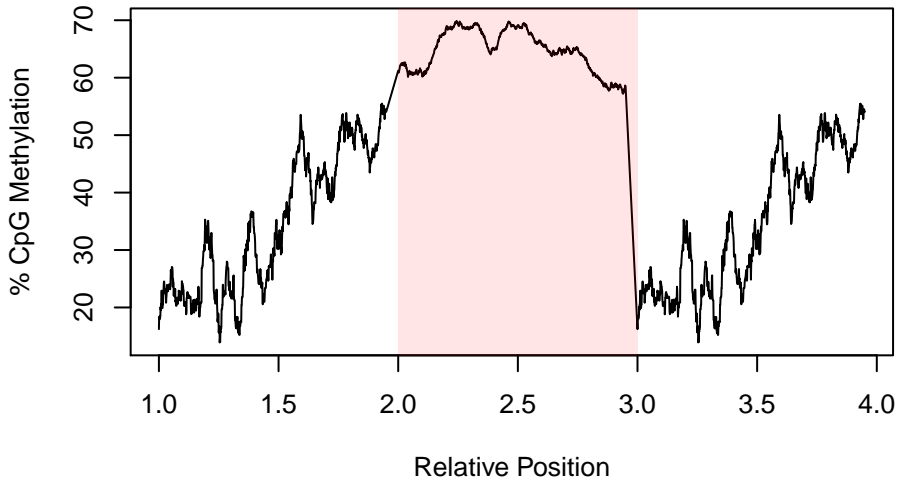

## TEs with domains, all CpGs

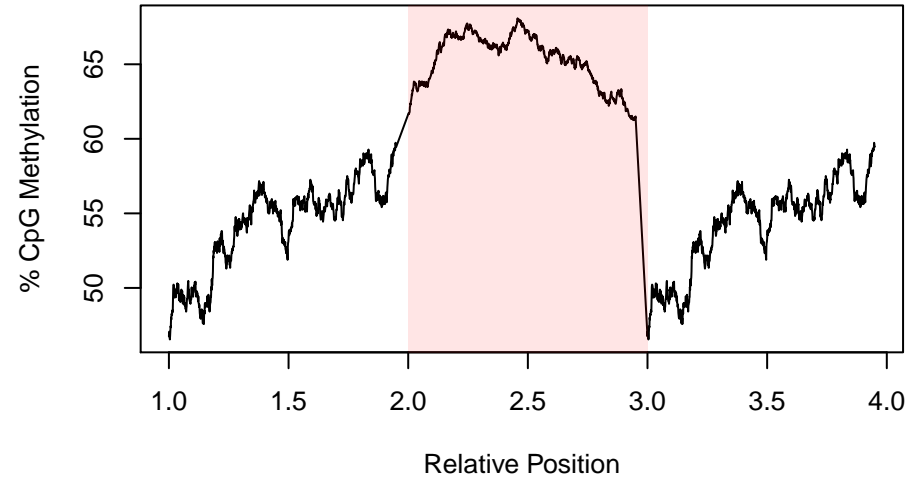

## All TEs, singly-annotated CpGs

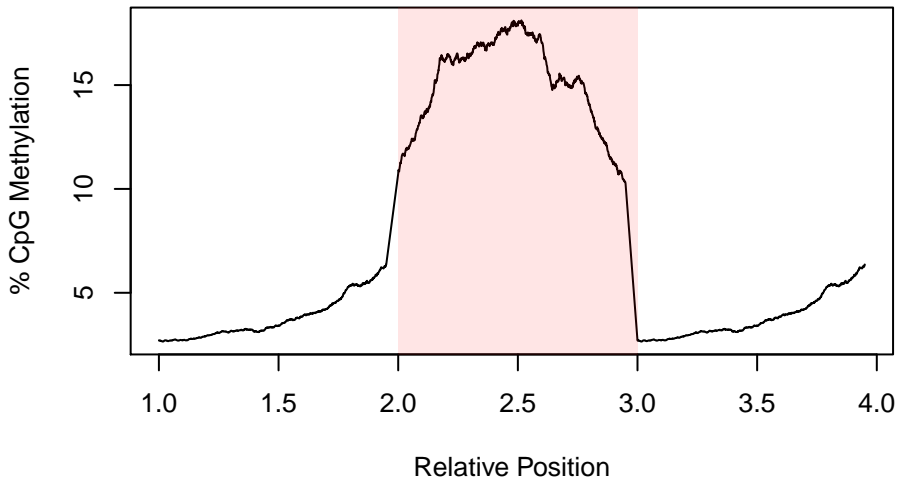

## All TEs, all CpGs

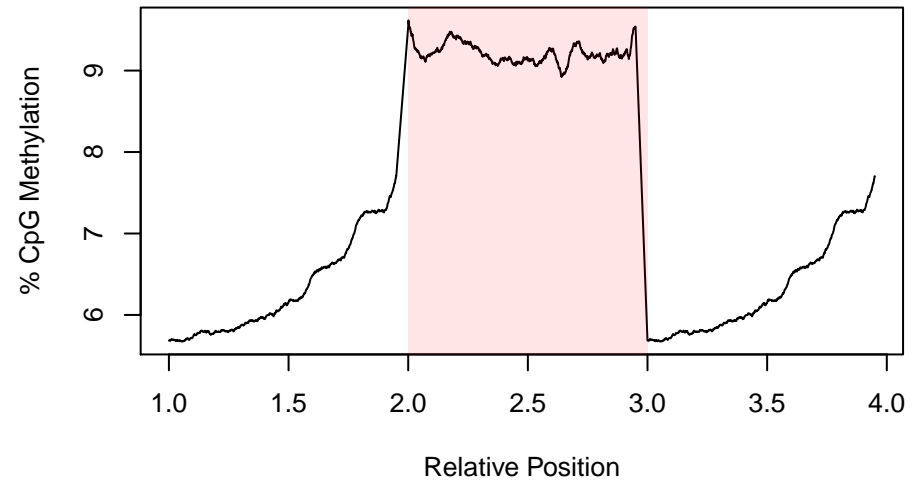

Supplement: pgen.1008864.s002.pdf [file pgen.1008864.s002.pdf]
