# Supplementary material for: ­­­­­­Widespread conservation and lineage-specific diversification of genome-wide DNA methylation patterns across arthropods
Source: PubMed Central journal article supplement (PMC7343188; doi:10.1371/journal.pgen.1008864), 2020-06-25

Genome-wide CpG methylation (%)

30  
20  
10  
0

Absent

Present

ALKB2

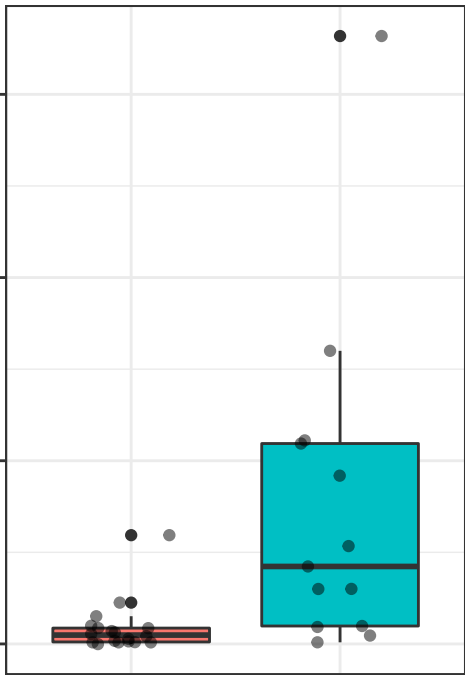

Supplement: pgen.1008864.s001.pdf [file pgen.1008864.s001.pdf]
