# Supplementary material for: ­­­­­­Widespread conservation and lineage-specific diversification of genome-wide DNA methylation patterns across arthropods
Source: PubMed Central journal article supplement (PMC7343188; doi:10.1371/journal.pgen.1008864), 2020-06-25

**A**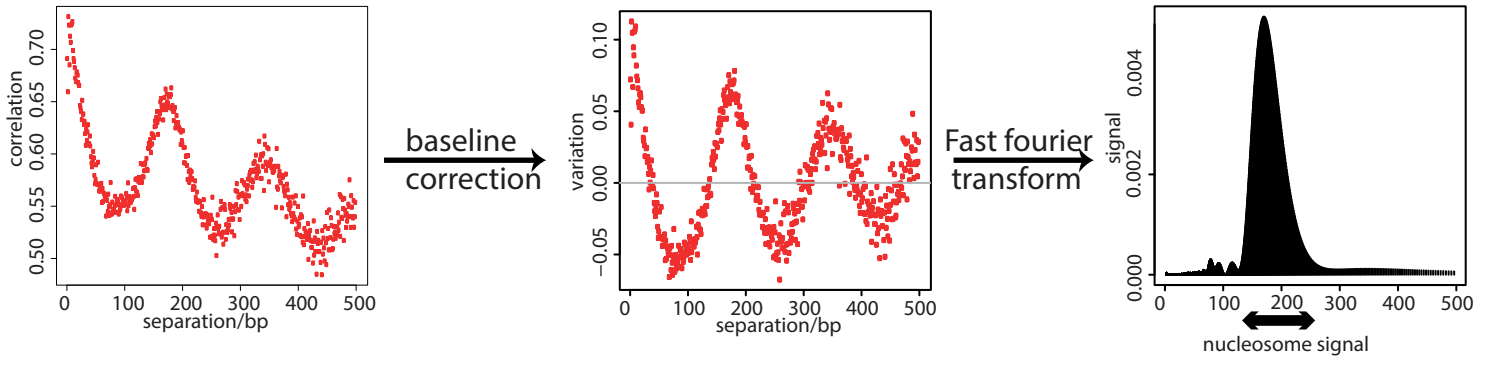**B**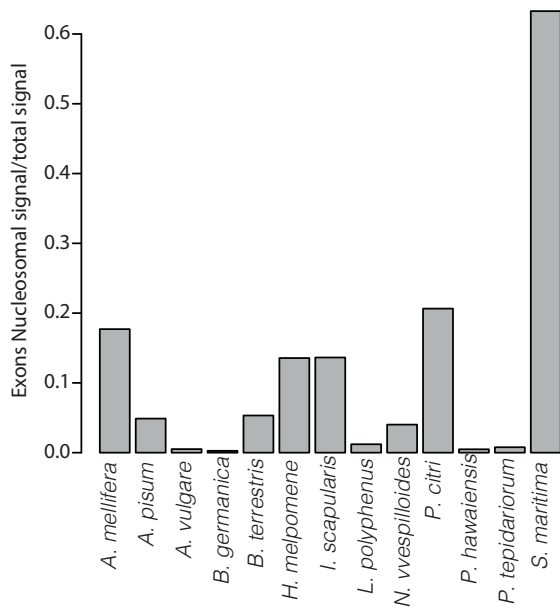**C**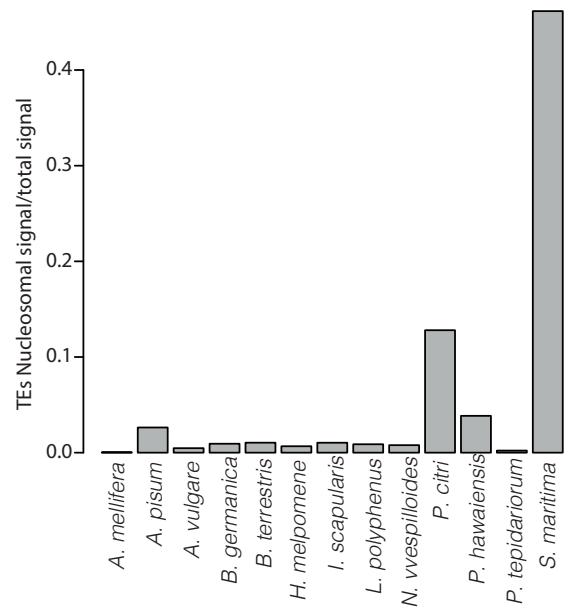

Supplement: pgen.1008864.s007.pdf [file pgen.1008864.s007.pdf]
